# Supplementary material for: A new perspective of lanthanide metal–organic frameworks: tailoring Dy-BTC nanospheres for rechargeable Li–O2 batteries
Source: Royal Society of Chemistry journal article supplement (doi:10.1039/d0nr00866d), 2020-01-01
Supplement: d0nr00866d1.pdf [file d0nr00866d1.pdf]

Electronic Supplementary Information

**A new perspective of the lanthanide metal–organic frameworks: tailoring Dy-BTC nanospheres for rechargeable Li-O<sub>2</sub> batteries†**

Dan Liu,<sup>a‡</sup> Xinmin Zhang,<sup>b‡</sup> Yan-Jie Wang,<sup>a\*</sup> Shuyan Song,<sup>c</sup> Lifeng Cui,<sup>a</sup> Hongbo Fan,<sup>a</sup>  
Xiaochang Qiao<sup>a</sup> and Baizeng Fang<sup>d\*</sup>

*<sup>a</sup>School of Materials Science and Engineering, Dongguan University of Technology, No. 1, Daxue Rd, Songshan Lake, Dongguan, Guangdong, P. R. China. Email: [wj@dgut.edu.cn](mailto:wj@dgut.edu.cn)*

*<sup>b</sup>HEC R&D Center, Institute of Electronic Materials, Dongguan, Guangdong, P. R. China*

*<sup>c</sup>State Key Laboratory of Rare Earth Resource Utilization, Changchun Institute of Applied Chemistry, Chinese Academy of Sciences, Changchun, Jilin, China.*

*<sup>d</sup>Department of Chemical & Biological Engineering & Clean Energy Research Center, University of British Columbia, 2360 East Mall, Vancouver, B.C. V6T 1Z3, Canada. Email: [bfang@chbe.ubc.ca](mailto:bfang@chbe.ubc.ca)*

† Electronic supplementary information (ESI) available. See DOI: 10.1039/x0xx00000x

‡ These authors have contributed equally to this work.

**Table S1.** Distortion values calculated for the Dy<sup>III</sup> ions geometry.

|                        | Hexacoordinate<br>Dy1 | S( $C_{5v}$ )<br>15.22 | S( $O_h$ )<br>10.04 | S( $D_{3h}$ )<br>5.64 |
|------------------------|-----------------------|------------------------|---------------------|-----------------------|
| Dy-BTC<br>S = symmetry |                       |                        |                     |                       |

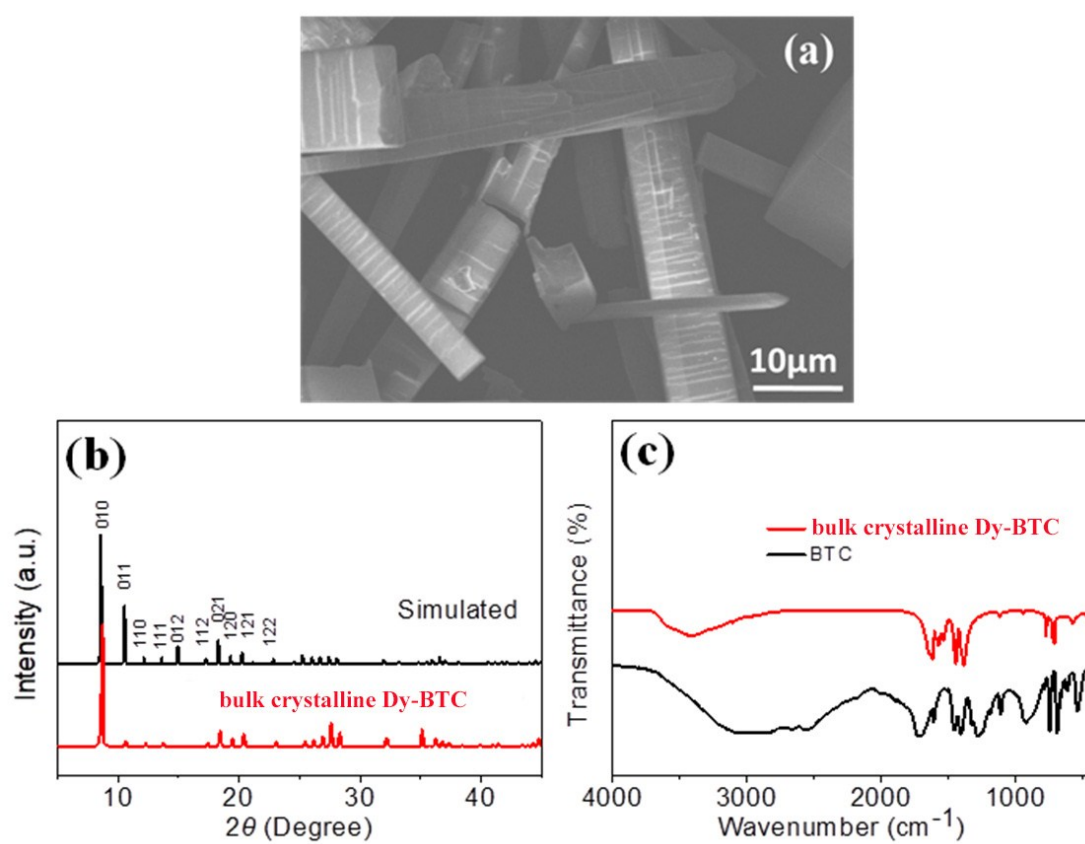

**Figure S1.** a) The SEM image of the bulk crystalline Dy-BTC, b) PXRD patterns and c) FTIR spectra.

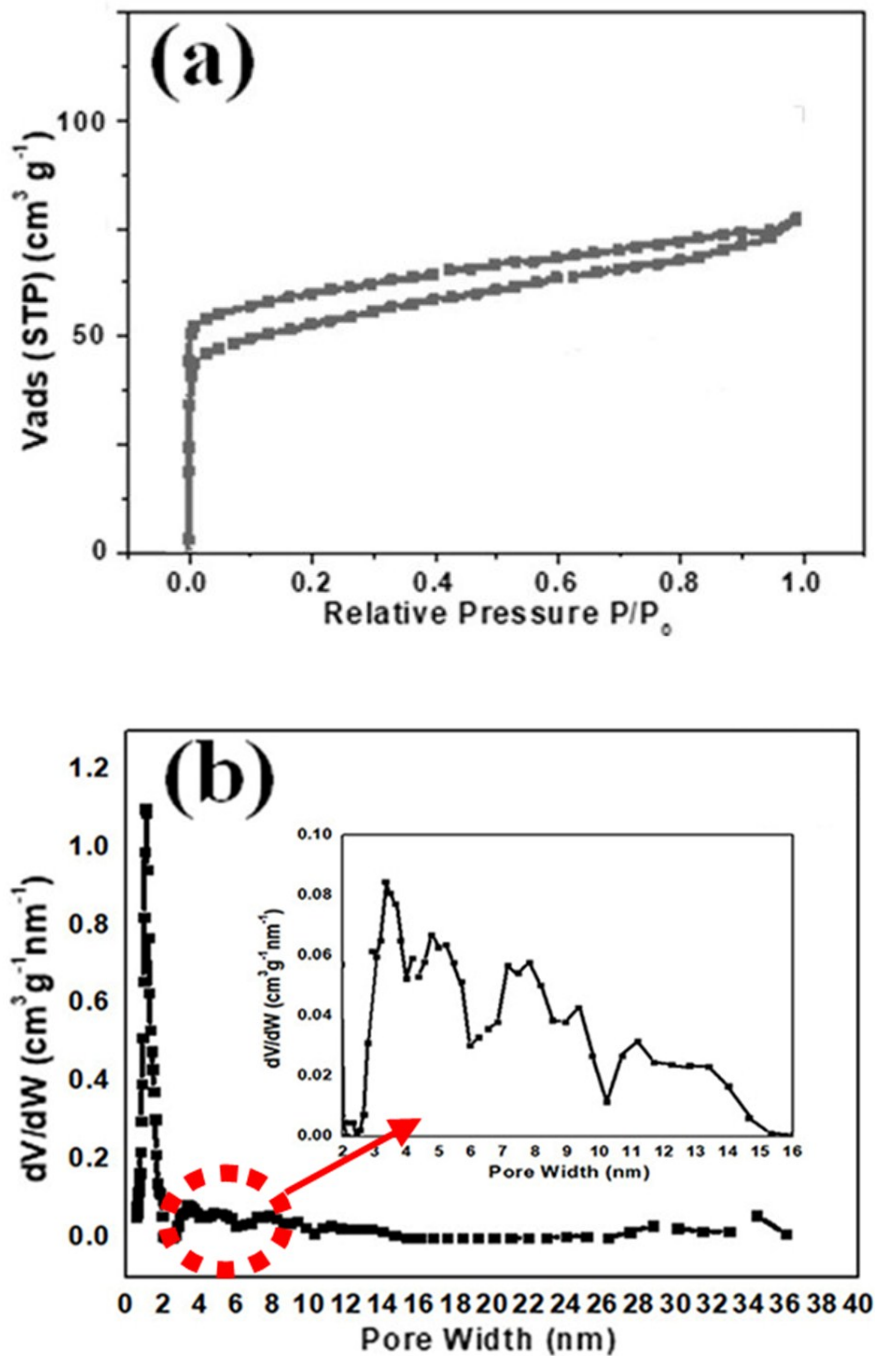

**Figure S2.** a) Low-pressure N<sub>2</sub>-adsorption isotherms at 77 K and b) the pore size distribution for the bulk crystalline Dy-BTC (the insert shows the enlarged plot of the marked area with red circle).

Evidently, the bulk crystalline Dy-BTC is dominated by micropores although a small fraction of mesopores exist.

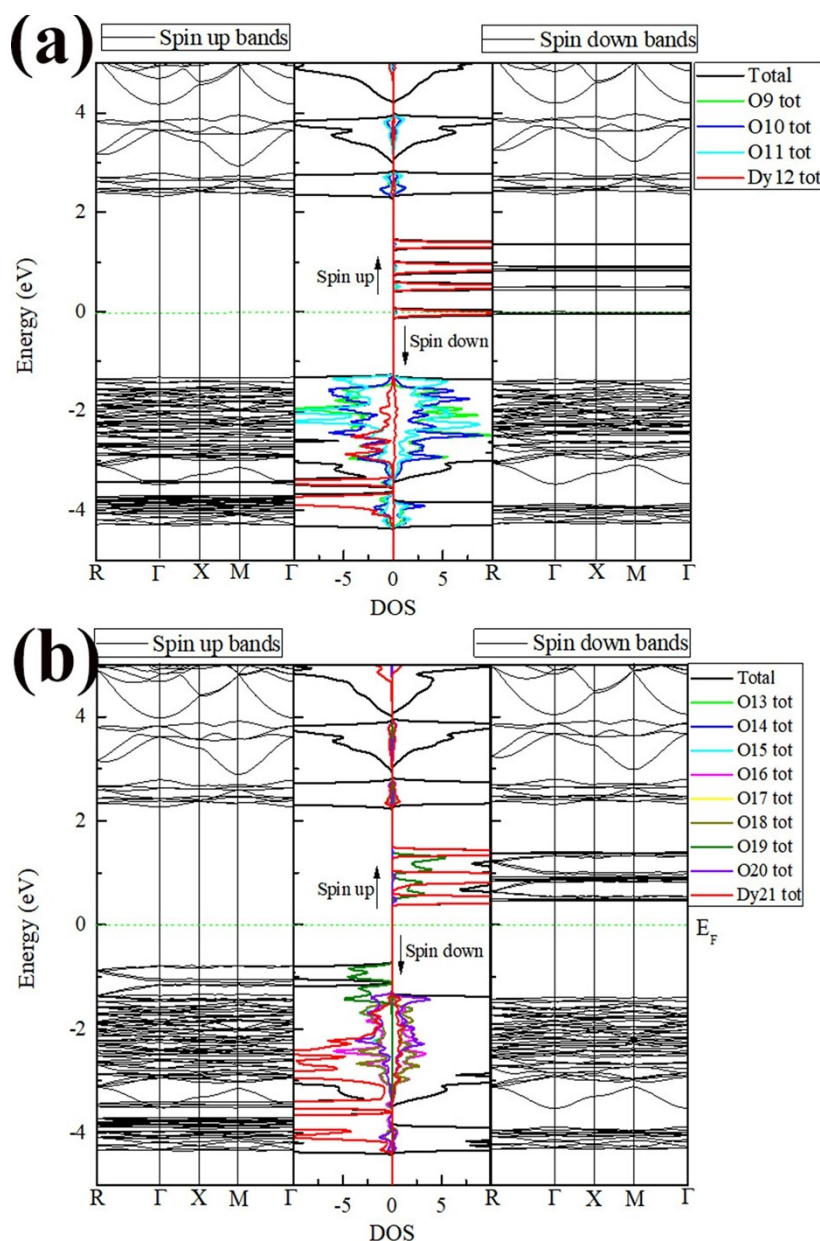

**Figure S3.** Band structure and DOS of a) Dy-BTC and b) Dy-BTC-O (i.e., Dy-BTC after O<sub>2</sub> adsorption).

To reveal the microscopic mechanism of the excellent performance of Dy-BTC, we performed the first-principles calculations of oxygen adsorption energy and electronic structure of Dy-BTC as well as its after adsorption of O<sub>2</sub>. We noticed that it exists unoccupied *f* orbitals around Fermi level in the electronic structure of Dy-BTC (Figure S3a). It is considered that these unoccupied *f* orbitals are prone to coordinate with O<sub>2</sub>. Comparing the electronic structures between Dy-BTC and its after O<sub>2</sub>-adsorption (Figure S3b), we discover, yet again that the unoccupied orbitals around Fermi level shift under the Fermi level due to its coordination with O<sub>2</sub>. Thus, we could conclude that the unoccupied *f* orbitals play an important role in the process of adsorption of O<sub>2</sub>.

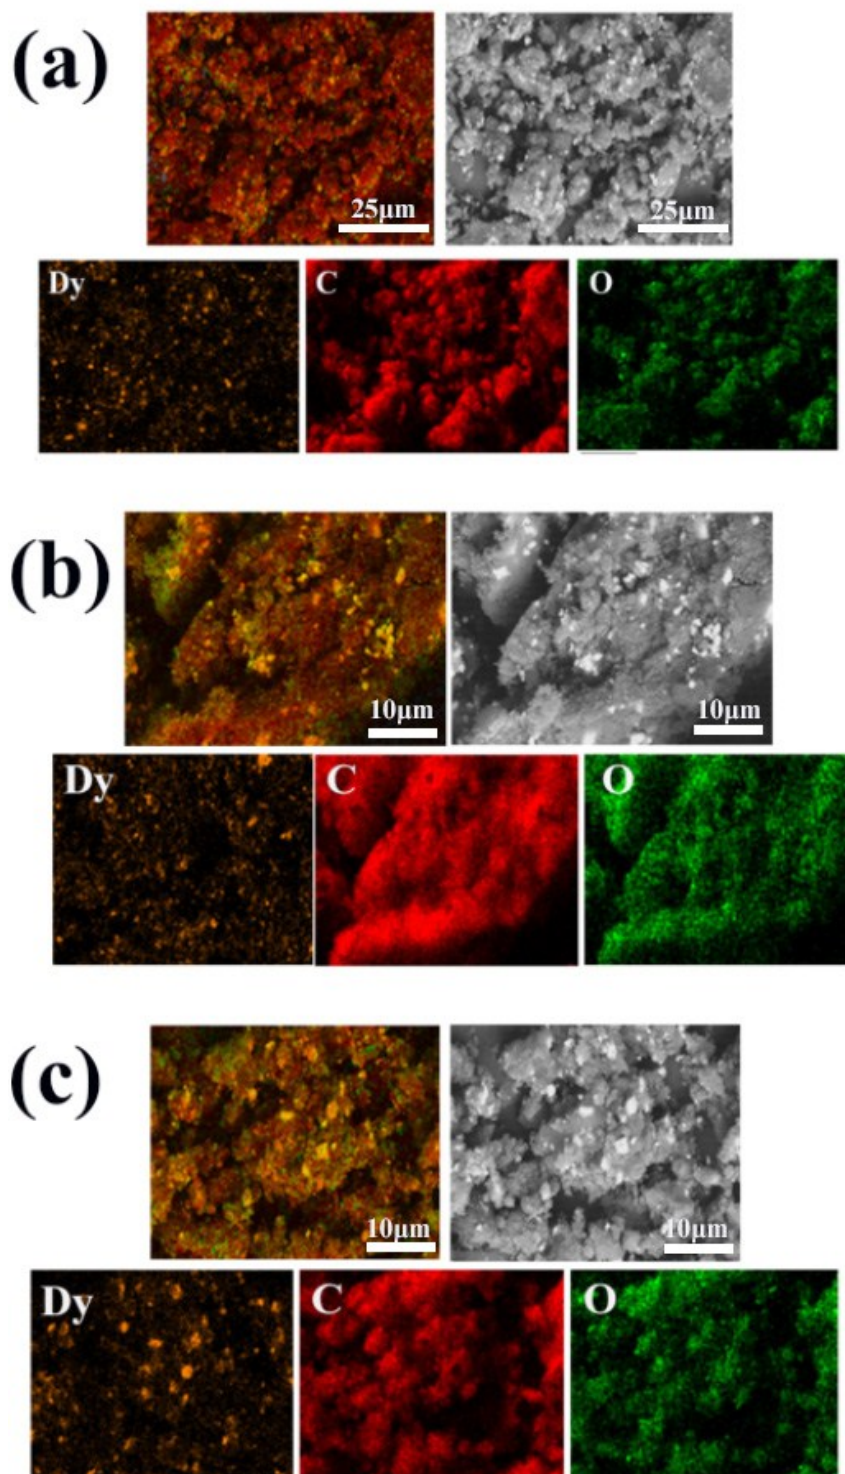

**Figure S4.** SEM images and EDX mappings of the Dy-BTC nanospheres-super P composite electrode at different stages: a) before discharge; b) after discharge; c) after charge.



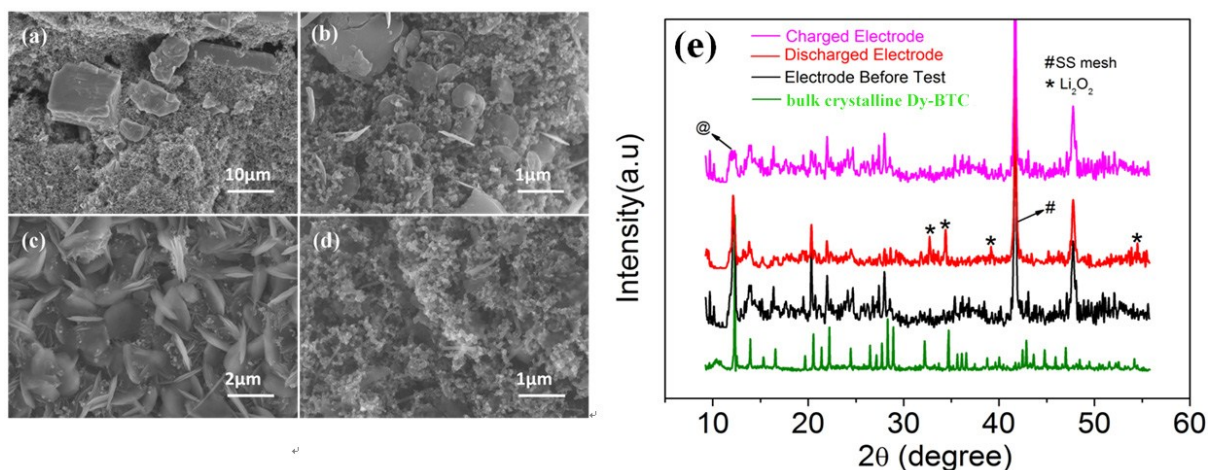

**Figure S5.** SEM images of the bulk crystalline Dy-BTC-super P composite electrode: a) before the test; b) half discharged; c) fully discharged; d) fully charged; e) XRD patterns of the electrode at different test states. The diffraction peaks located at  $12.5^\circ$  (the characteristic peak of Dy-BTC MOFs marked by @) disappeared after fully charging implying that the bulk crystalline Dy-BTC collapsed after being recharged, which is consistent with the observation from the SEM image shown in Figure S4d.

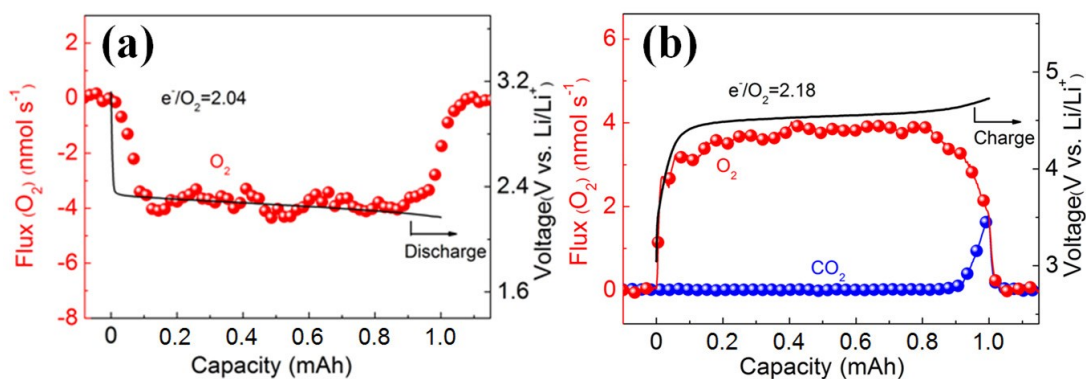

**Figure S6.** DEMS of the bulk crystalline Dy-BTC-based electrode during a) discharge and b) charge.

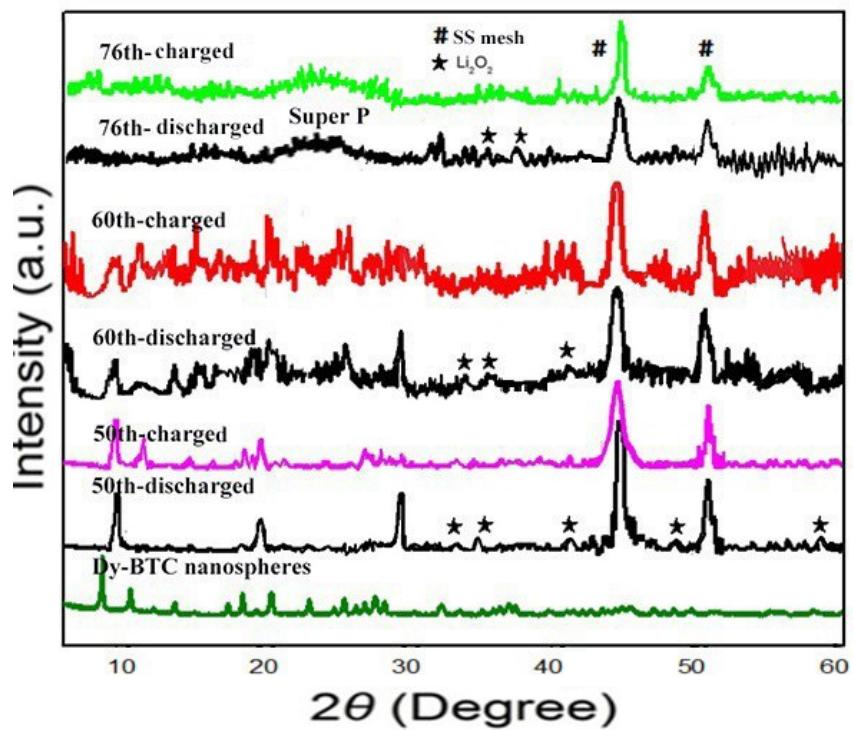

**Figure S7.** XRD patterns of the Dy-BTC nanospheres-super P composite electrode after the 50th, 60th and 76th cycle of charge/discharge.

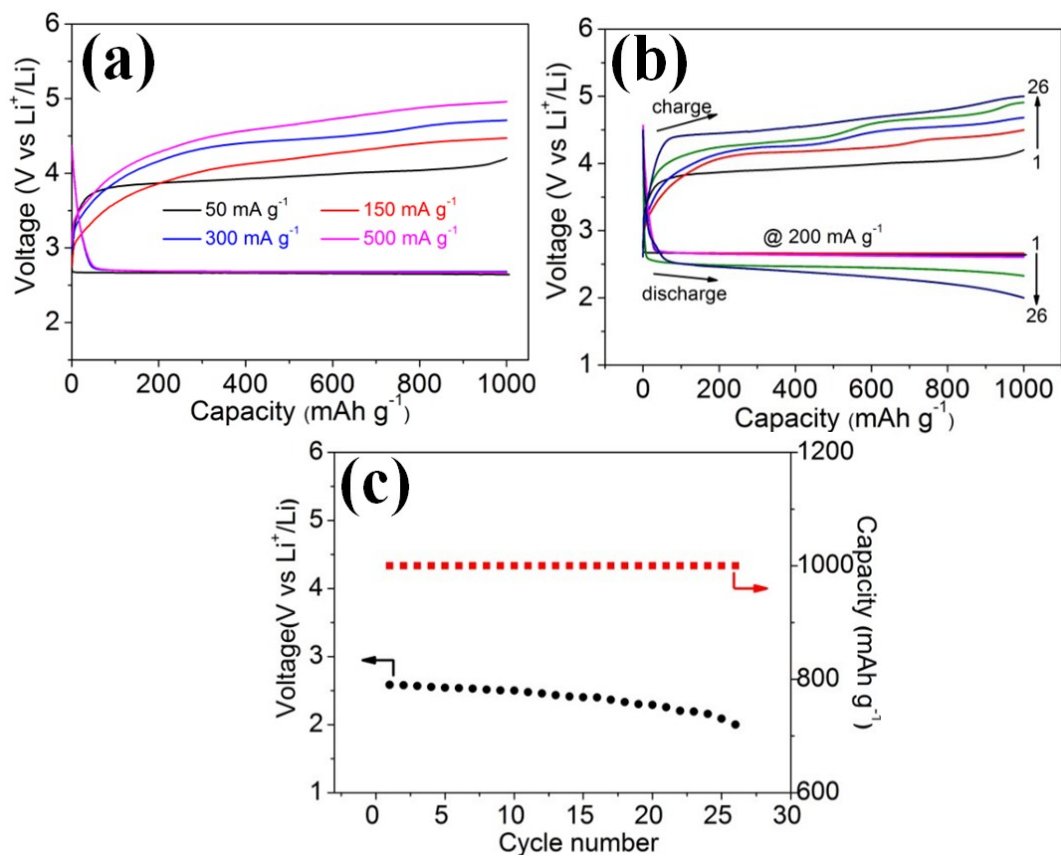

**Figure S8.** a) Rate capability of the bulk crystalline Dy-BTC-based electrode in pure O<sub>2</sub> with a fixed capacity of 1000 mAh g<sup>-1</sup>; b) Representative cycling response of the bulk crystalline Dy-BTC-based electrode under the specific capacity limit of 1000 mAh g<sup>-1</sup>, with discharge/charge curves at cycle 1, 5, 10, 25, and 26 shown. Current: 200 mA g<sup>-1</sup>; c) Discharge voltage and capacity retention vs. cycle number.
